# Supplementary material
Source: publisher figshare collection journal article supplement (https://acs.figshare.com/ndownloader/files/5074489)
Supplement: Supplementary file 1 [file 5074489]

## Supporting Information

### Scanning Electrochemical Microscopy. 56. Probing Outside and Inside Single Giant Liposomes Containing $\text{Ru}(\text{bpy})_3^{2+}$

Wei Zhan and Allen J. Bard\*

*Department of Chemistry and Biochemistry, University of Texas, 1 University Station, A5300, Austin, Texas 78712*

Three approach curves of tip breaking into liposomes filled with  $\text{Ru}(\text{bpy})_3^{2+}$  (as the case illustrated in Fig. 6 (A)) are shown in the following.

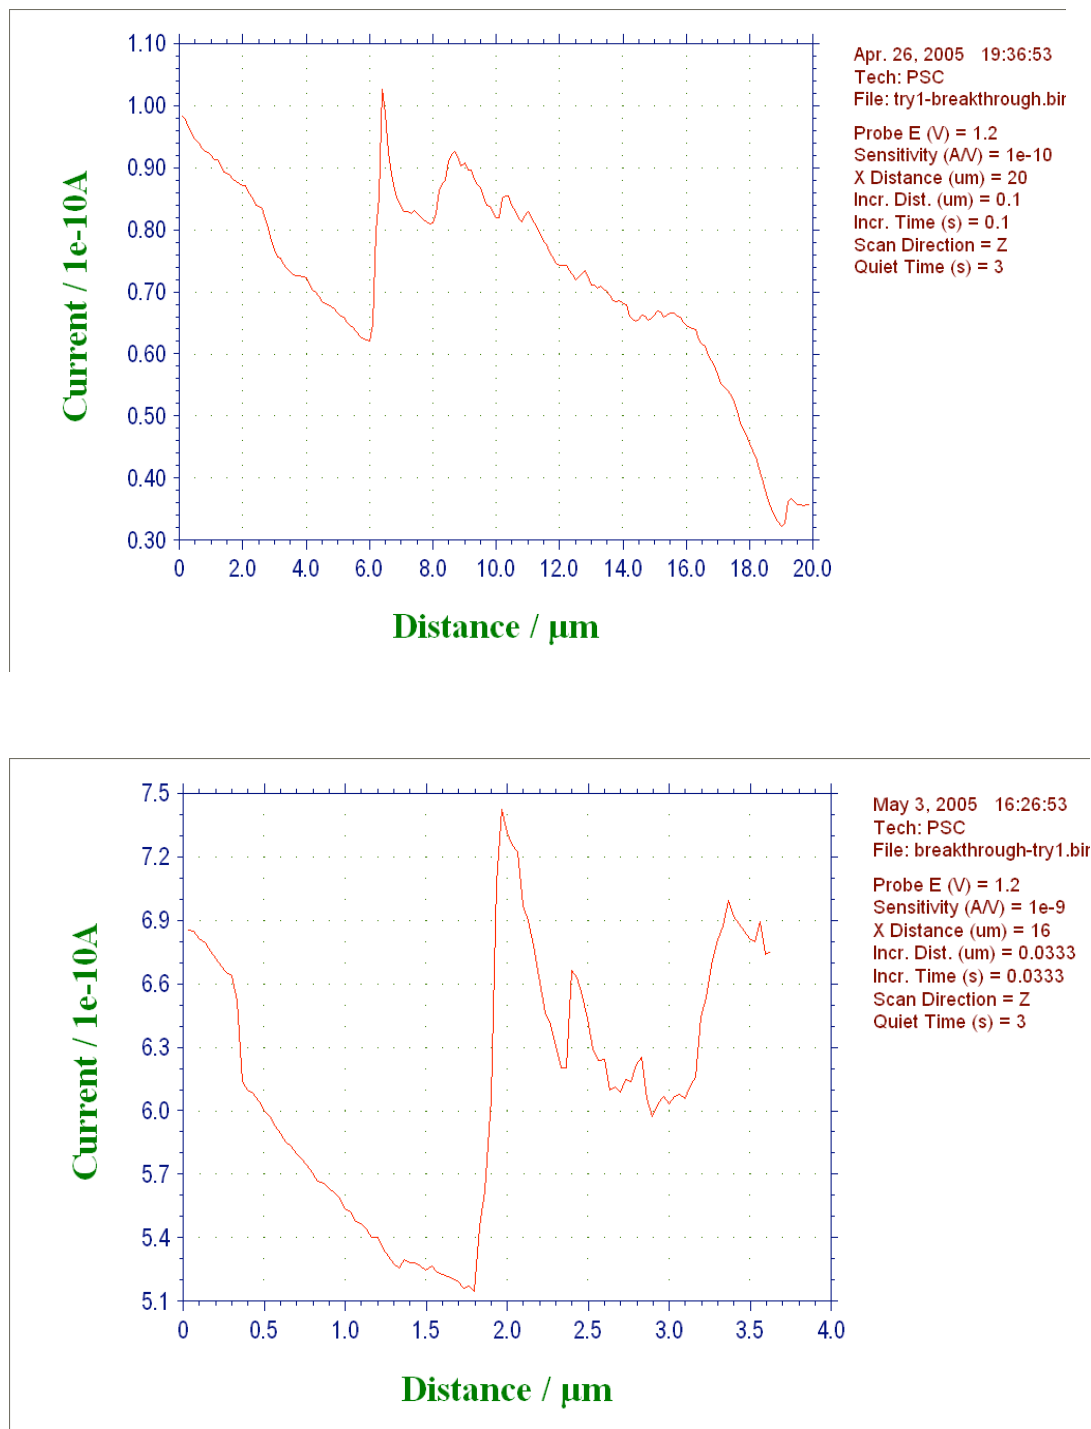

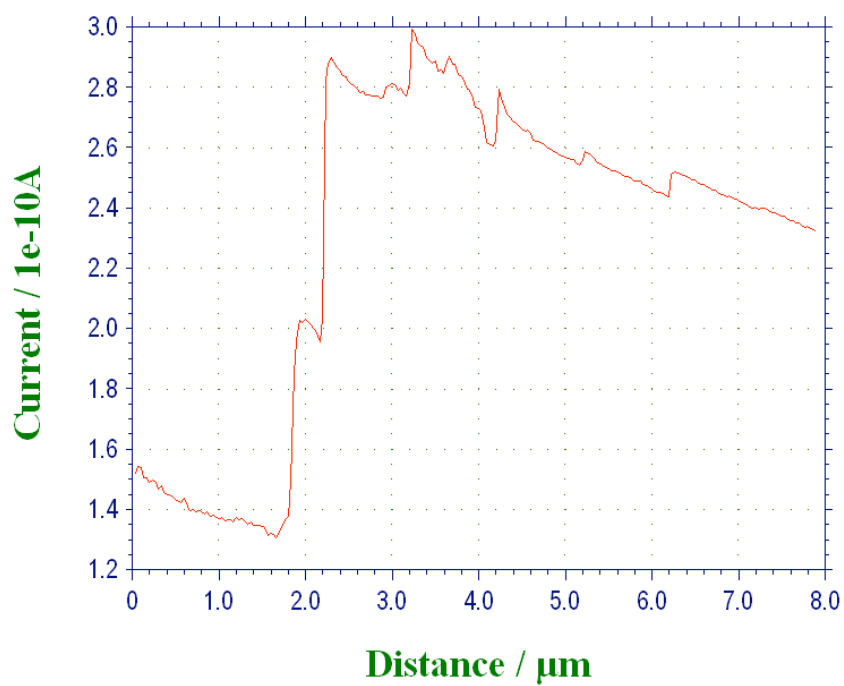

May 10, 2005 14:35:32  
Tech: PSC  
File: try1.bin

Probe E (V) = 1.2  
Sensitivity (A/V) =  $1\text{e-}9$   
X Distance ( $\mu\text{m}$ ) = 15  
Incr. Dist. ( $\mu\text{m}$ ) = 0.0333  
Incr. Time (s) = 0.0333  
Scan Direction = Z  
Quiet Time (s) = 3
